# Supplementary material
Source: PubMed Central journal article supplement (PMC9728094)
Supplement: NIHMS1841115-supplement-Supplementary_file.pdf [file NIHMS1841115-supplement-Supplementary_file.pdf]

# Immune-related adverse events of checkpoint inhibitors

---

*Manuel Ramos-Casals, Julie R. Brahmer, Margaret K. Callahan, Alejandra Flores-Chávez, Niamh Keegan, Munther A. Khamashta, Olivier Lambotte, Xavier Mariette, Aleix Prat and Maria E. Suárez-Almazor*

<https://doi.org/10.1038/s41572-020-0160-6>

## Supplementary Information.

Rates of reactivation/flare of pre-existing autoimmune diseases after ICI therapy. Detailed rates in individual and grouped diseases.

| Autoimmune diseases           | Frequency of relapse (%) | Pre-existing cases (n) | Relapse after ICI therapy (n) | References                |
|-------------------------------|--------------------------|------------------------|-------------------------------|---------------------------|
| Polymyalgia rheumatica        | 76,47                    | 17                     | 13                            | 1, 2, 3, 4, 5, 6, 7       |
| Myasthenia/myositis           | 57,14                    | 14                     | 8                             | 1, 2, 3, 5, 6, 7, 9       |
| Rheumatoid arthritis          | 53,49                    | 86                     | 46                            | 1, 2, 3, 4, 5, 6, 7, 8, 9 |
| Psoriasis/Psoriatic arthritis | 51,69                    | 118                    | 61                            | 1, 2, 3, 4, 5, 6, 7, 8, 9 |
| Other arthritis (1)           | 44,44                    | 9                      | 4                             | 2, 4, 6                   |
| Inflammatory bowel disease    | 34,62                    | 52                     | 18                            | 2, 3, 4, 5, 6, 7, 8, 9    |
| Sjögren syndrome              | 27,27                    | 11                     | 3                             | 1, 2, 5, 6, 7             |
| Autoimmune cytopenias (2)     | 27,27                    | 11                     | 3                             | 1, 2, 5, 6, 7, 9          |
| Systemic sclerosis            | 25,00                    | 8                      | 2                             | 2, 5, 7, 8                |
| Sarcoidosis                   | 25,00                    | 20                     | 5                             | 1, 3, 4, 5, 6, 7, 8       |
| Spondyloarthropathies         | 25,00                    | 16                     | 4                             | 1, 3, 6, 7, 8             |
| Other cutaneous (3)           | 22,22                    | 9                      | 2                             | 1, 2, 5, 6, 8, 9          |
| Vitiligo                      | 18,18                    | 22                     | 4                             | 1, 6, 7                   |
| Demyelinating CNS (4)         | 16,67                    | 18                     | 3                             | 1, 2, 3, 4, 6, 7, 8       |
| ANCA vasculitis               | 14,29                    | 7                      | 1                             | 3, 6, 8, 7                |
| Thyroiditis                   | 12,09                    | 91                     | 11                            | 1, 2, 3, 4, 5, 6, 7, 8, 9 |
| Lupus                         | 11,76                    | 17                     | 2                             | 1, 2, 4, 5, 6, 7, 9       |
| PRP/cranial palsies (7)       | 0,00                     | 6                      | 0                             | 3, 5, 6                   |
| Large/medium vasculitis (6)   | 0,00                     | 5                      | 0                             | 1, 2, 7                   |
| Other digestive (5)           | 0,00                     | 9                      | 0                             | 4, 5, 6, 7, 8, 9          |

(1) Non-specific arthritis, inflammatory arthritis, reactive arthritis/Reiter syndrome

(2) Immune thrombocytopenia, autoimmune hemolytic anemia, pernicious anemia

(3) Urticaria autoimmune, Alopecia areata, Cold agglutinin, Eczema, Erythema nodosum, Hidradenitis suppurativa, Lichen planus, Pemphigus

(4) Multiple sclerosis, myelitis, neuromyelitis

(5) Celiac disease, primary biliary colangitis, Autoimmune hepatitis, Pancreatitis

(6) Giant cell arteritis, polyarteritis nodosa

(7) Guillain-Barré syndrome, chronic polyradiculopathy, VII palsy

# Flow diagram of search results

Identification

Screening

Eligibility

Inclusion

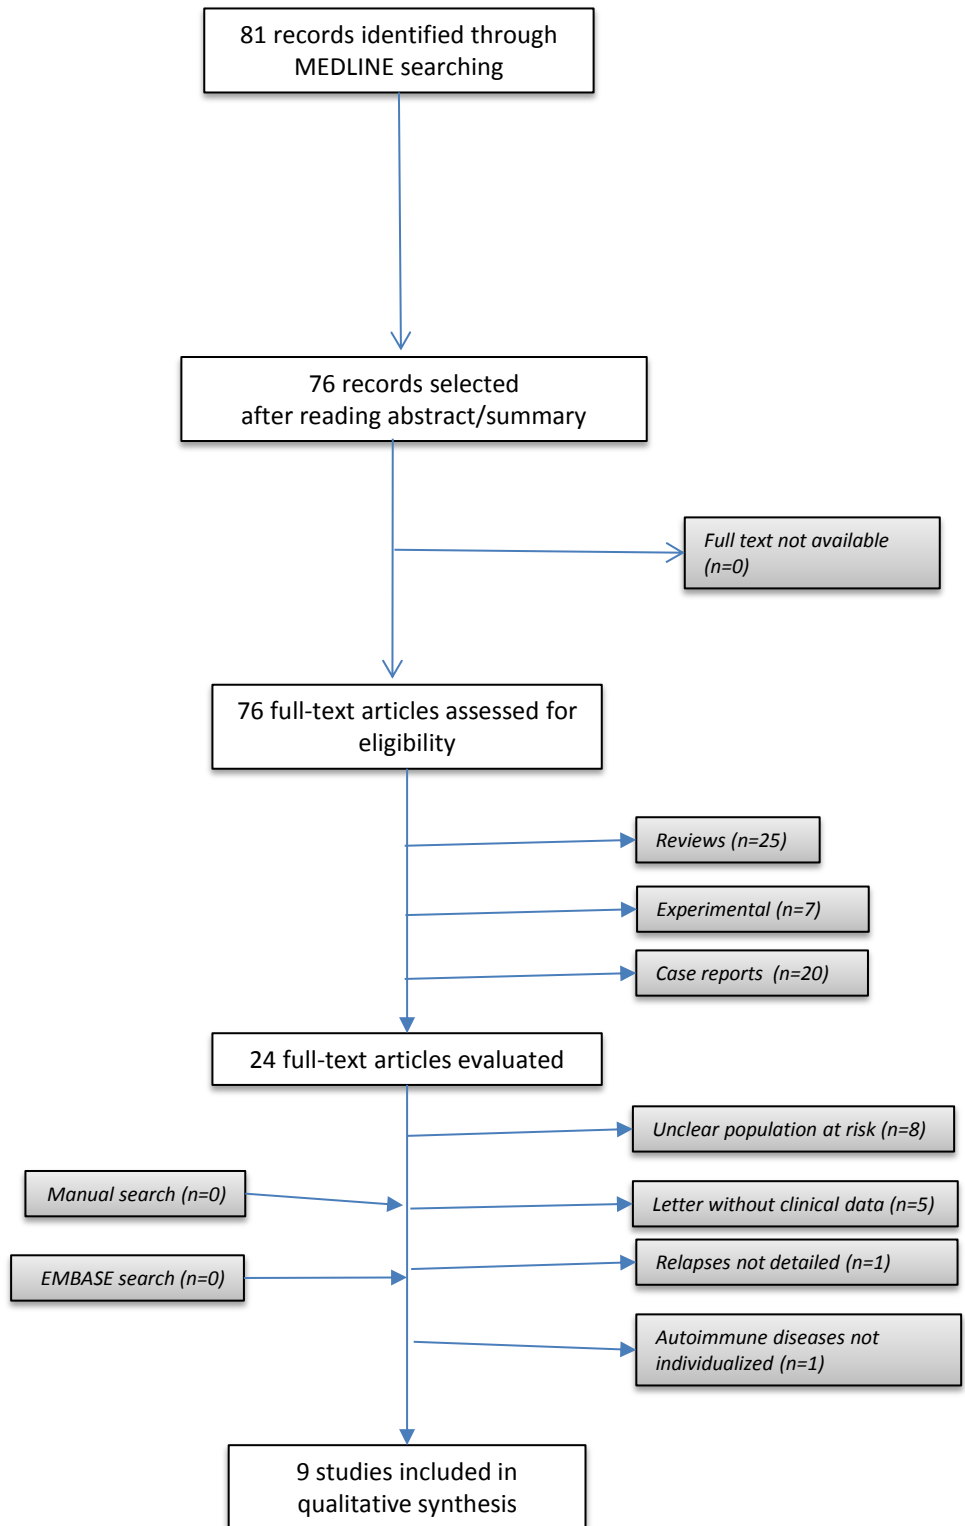

## References

1. Danlos, F.-X. *et al.* Safety and efficacy of anti-programmed death 1 antibodies in patients with cancer and pre-existing autoimmune or inflammatory disease. *Eur. J. Cancer* **91**, 21–29 (2018).
2. Leonardi, G. C. *et al.* Safety of Programmed Death-1 Pathway Inhibitors Among Patients With Non-Small-Cell Lung Cancer and Preexisting Autoimmune Disorders. *J. Clin. Oncol.* **36**, 1905–1912 (2018).
3. Gutzmer, R. *et al.* Programmed cell death protein-1 (PD-1) inhibitor therapy in patients with advanced melanoma and preexisting autoimmunity or ipilimumab-triggered autoimmunity. *Eur. J. Cancer* **75**, 24–32 (2017).
4. Johnson, D. B. *et al.* Ipilimumab Therapy in Patients With Advanced Melanoma and Preexisting Autoimmune Disorders. *JAMA Oncol.* **2**, 234–240 (2016).
5. Menzies, A. M. *et al.* Anti-PD-1 therapy in patients with advanced melanoma and preexisting autoimmune disorders or major toxicity with ipilimumab. *Ann. Oncol. Off. J. Eur. Soc. Med. Oncol.* **28**, 368–376 (2017).
6. Abdel-Wahab, N., Shah, M., Lopez-Olivo, M. A. & Suarez-Almazor, M. E. Use of Immune Checkpoint Inhibitors in the Treatment of Patients With Cancer and Preexisting Autoimmune Disease: A Systematic Review. *Ann. Intern. Med.* **168**, 121–130 (2018).
7. Tison, A. *et al.* Safety and Efficacy of Immune Checkpoint Inhibitors in Patients With Cancer and Preexisting Autoimmune Disease: A Nationwide, Multicenter Cohort Study. *Arthritis Rheumatol. (Hoboken, N.J.)* **71**, 2100–2111 (2019).
8. Kahler, K. C. *et al.* Ipilimumab in metastatic melanoma patients with pre-existing autoimmune disorders. *Cancer Immunol. Immunother.* **67**, 825–834 (2018).
9. Kaur, A. *et al.* Immune-related adverse events in cancer patients treated with immune checkpoint inhibitors: A single-center experience. *Medicine (Baltimore)*. **98**, e17348 (2019).
